# Supplementary material for: Optimization of the time and temperature of the microwave-assisted amination of phenylene-PMO
Source: Royal Society of Chemistry journal article supplement (doi:10.1039/c4ra12364f), 2014-12-23
Supplement: c4ra12364f1.pdf [file c4ra12364f1.pdf]

## Electronic Supplementary Information

### Optimization of the time and temperature of the microwave-assisted amination of the phenylene-PMO

Mirtha A. O. Lourenço<sup>a</sup>, José R. B. Gomes<sup>b</sup>, Paula Ferreira<sup>\*a</sup>

<sup>a</sup>CICECO, Department of Materials & Ceramics Engineering, University of Aveiro, Campus Universitário de Santiago, 3810-193 Aveiro, Portugal.

<sup>b</sup>CICECO, Department of Chemistry, University of Aveiro, Campus Universitário de Santiago, 3810-193 Aveiro, Portugal.

\*Corresponding author: Fax: +351234401470; Tel: +351234401419; E-mail: pcferreira@ua.pt

### Table of Contents

**Figure S1.** <sup>13</sup>C CP-MAS NMR spectra of PMO, NO<sub>2</sub>-PMO<sub>C</sub> and NO<sub>2</sub>-PMO<sub>x/y</sub> materials.

**Figure S2.** FTIR (ATR) spectra of PMO and NO<sub>2</sub>-PMO<sub>x/y</sub> materials.

**Figure S3.** FTIR (ATR) spectra of PMO, NO<sub>2</sub>-PMO<sub>15min/60°C</sub> and NH<sub>2</sub>-PMO<sub>15min/y</sub> materials.

**Table S1.** Texture parameters and physical properties of PMO and NO<sub>2</sub>-PMO<sub>x/y</sub> materials.

**Figure S4.** PXRD of Ph-PMO and NO<sub>2</sub>-Ph-PMO<sub>15min</sub> synthesized at different reaction temperatures during 15 minutes.

**Figure S5.** -196 °C N<sub>2</sub> isotherms and PSD curves of PMO and NO<sub>2</sub>-PMO<sub>x/y</sub> materials.

**Figure S6.** TGA of PMO and NO<sub>2</sub>-PMO<sub>x/y</sub> materials.

**Figure S7.** SEM images for NO<sub>2</sub>-PMO<sub>C</sub>, NO<sub>2</sub>-PMO<sub>15min/37°C</sub> and NO<sub>2</sub>-PMO<sub>360min/60°C</sub>.

**Figure S8.** <sup>29</sup>Si MAS and CP-MAS NMR spectra of NH<sub>2</sub>-PMO<sub>15min/60°C</sub>.

**Table S2.** Texture parameters and physical properties of PMO, NO<sub>2</sub>-PMO<sub>15min/60°C</sub> and NH<sub>2</sub>-PMO<sub>15min/y</sub> materials.

**Figure S9.** -196 °C N<sub>2</sub> isotherms and PSD curves of NO<sub>2</sub>-PMO<sub>15min/60°C</sub>, NH<sub>2</sub>-PMO<sub>15min/37°C\_C</sub>, NH<sub>2</sub>-PMO<sub>15min/37°C</sub> and NH<sub>2</sub>-PMO<sub>15min/90°C</sub>.

**Figure S10.** TGA of PMO, NO<sub>2</sub>-PMO<sub>15min/60°C</sub>, NH<sub>2</sub>-PMO<sub>15min/37°C</sub> and NH<sub>2</sub>-PMO<sub>15min/90°C</sub> materials.

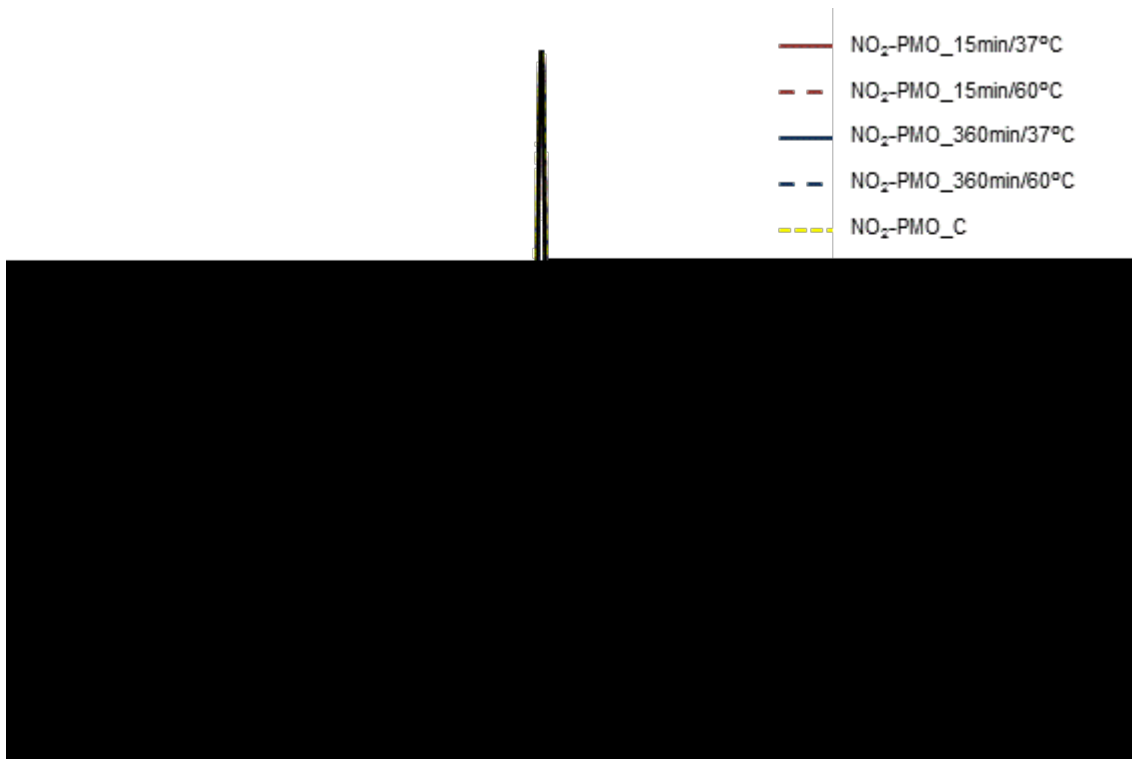

**Figure S1.**  $^{13}\text{C}$  CP MAS NMR spectra for PMO and  $\text{NO}_2\text{-PMO}_{x/y}$  samples obtained under different synthetic conditions. \* denotes spinning sidebands.

a)

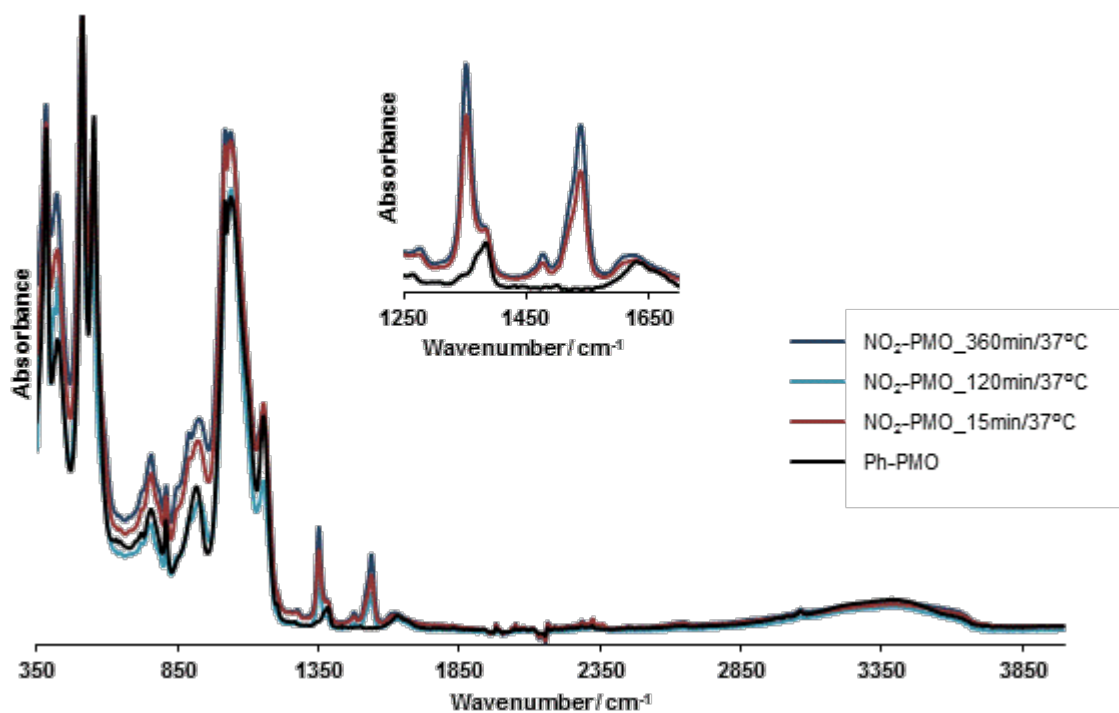

b)

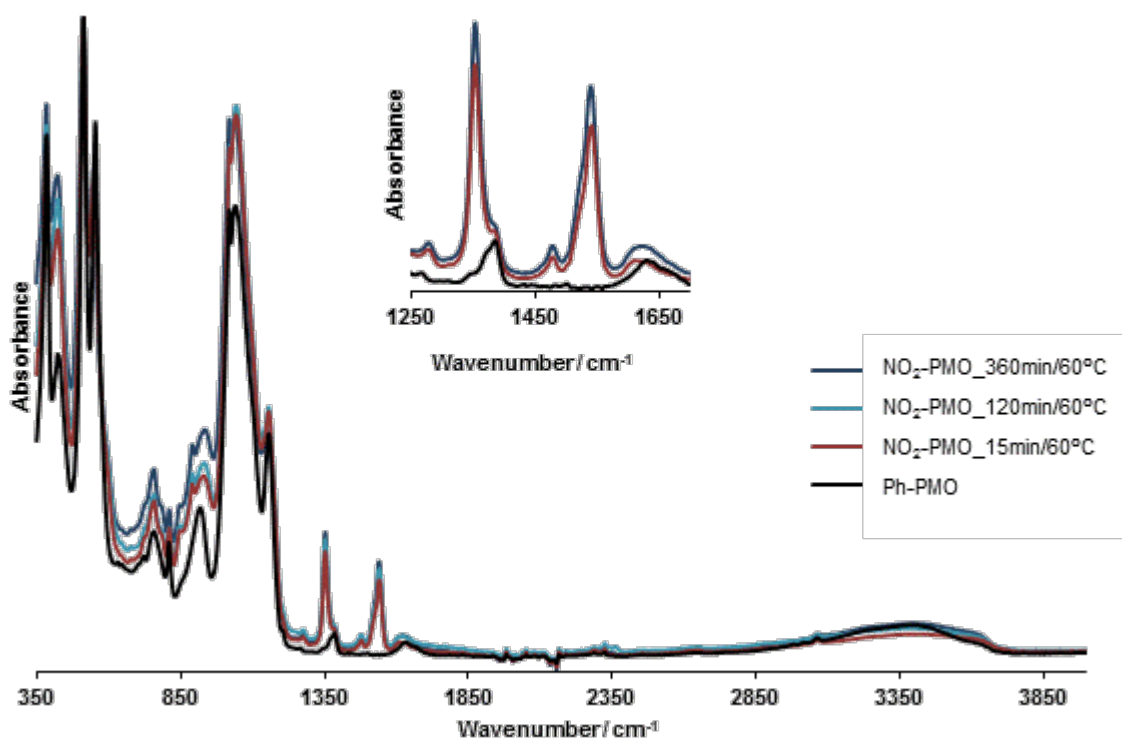

c)

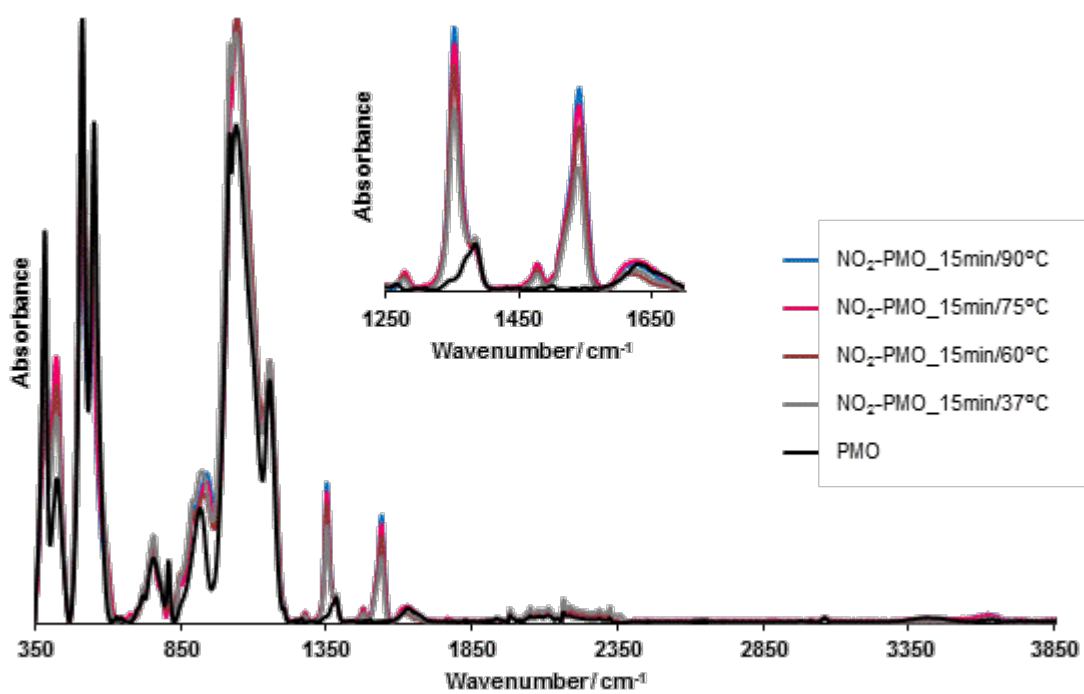

d)

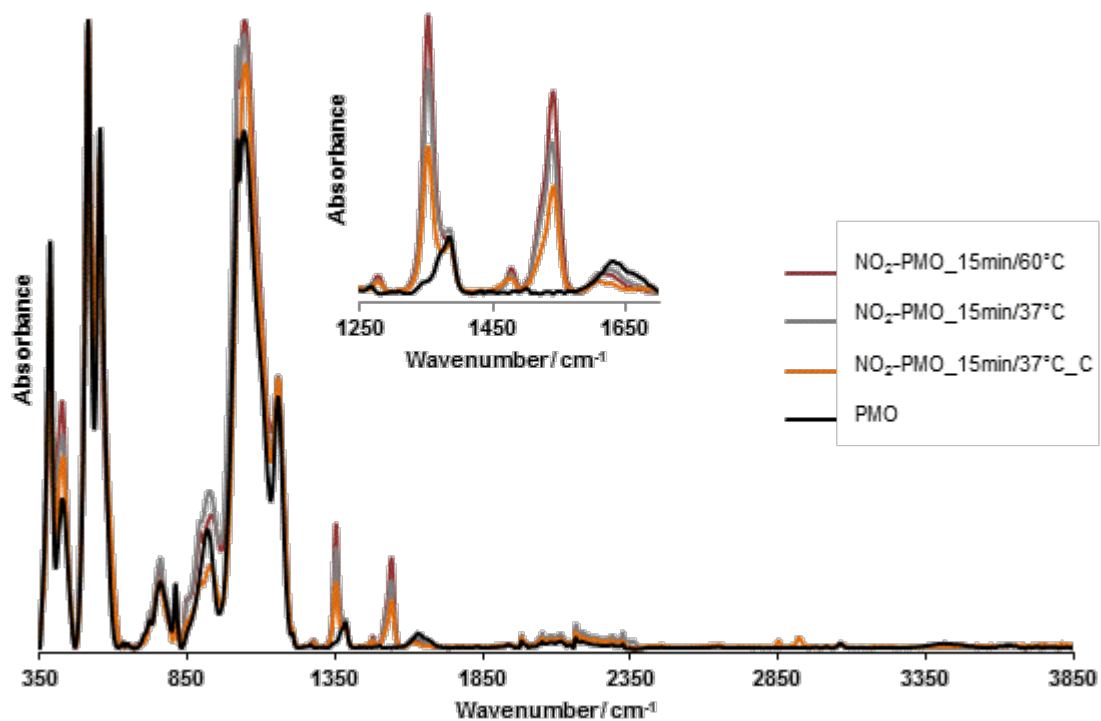

**Figure S2.** FTIR (ATR) spectra of PMO, NO<sub>2</sub>-PMO<sub>x/y</sub> at a) 37 °C and b) 60 °C for different reaction times, c) NO<sub>2</sub>-PMO<sub>15min/y</sub> at different temperatures and d) NO<sub>2</sub>-PMO<sub>15min/y</sub> at different temperatures using microwave and conventional heating. The insets display the region 1250 – 1700  $\text{cm}^{-1}$  magnified.

ified.

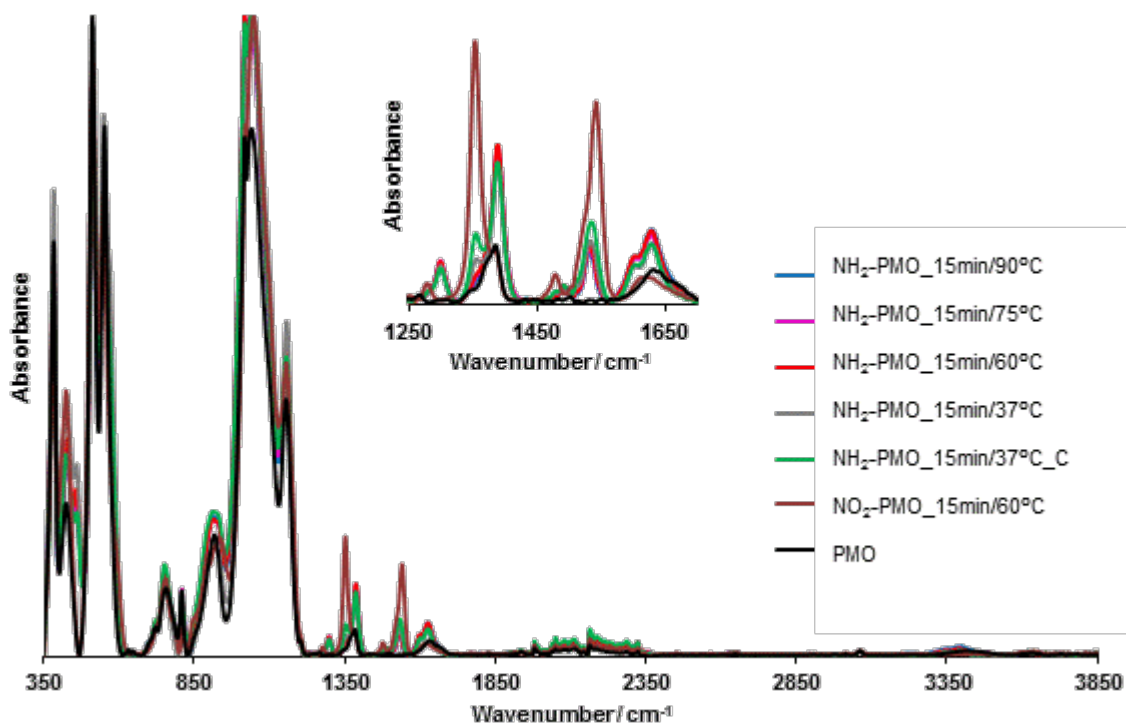

**Figure S3.** FTIR (ATR) spectra of PMO, NO<sub>2</sub>-PMO\_15min/60°C and NH<sub>2</sub>-PMO\_15min/y at different temperatures. The insets display the region 1250 – 1700 cm<sup>-1</sup> magnified.

**Table S1.** Textural parameters and physical properties of PMO and NO<sub>2</sub>-PMOs\_x/y.

| Sample                           | $d_{100} / \text{nm}$ | $a / \text{nm}^a$ | $S_{\text{BET}} / \text{m}^2 \text{g}^{-1}$ | $V_p / \text{cm}^3 \text{g}^{-1}$ | $d_p / \text{nm}^b$ | $b / \text{nm}^c$ |
|----------------------------------|-----------------------|-------------------|---------------------------------------------|-----------------------------------|---------------------|-------------------|
| PMO                              | 4.55                  | 5.25              | 920                                         | 0.66                              | 3.58                | 1.67              |
| NO <sub>2</sub> -PMO_15min/37°C  | 4.70                  | 5.42              | 788                                         | 0.62                              | 3.58                | 1.84              |
| NO <sub>2</sub> -PMO_120min/37°C | 4.50                  | 5.20              | 757                                         | 0.58                              | 3.51                | 1.69              |
| NO <sub>2</sub> -PMO_360min/37°C | 4.65                  | 5.36              | 626                                         | 0.49                              | 3.51                | 1.85              |
| NO <sub>2</sub> -PMO_15min/60°C  | 4.70                  | 5.42              | 698                                         | 0.57                              | 3.54                | 1.88              |
| NO <sub>2</sub> -PMO_120min/60°C | 4.55                  | 5.25              | 743                                         | 0.57                              | 3.51                | 1.74              |
| NO <sub>2</sub> -PMO_360min/60°C | 4.55                  | 5.25              | 808                                         | 0.63                              | 3.51                | 1.74              |
| NO <sub>2</sub> -PMO_15min/75°C  | 4.82                  | 5.57              | 730                                         | 0.61                              | 3.69                | 1.88              |
| NO <sub>2</sub> -PMO_15min/90°C  | 4.82                  | 5.57              | 776                                         | 0.65                              | 3.55                | 2.02              |

<sup>a</sup>Unit cell parameter calculated as  $(2d_{100}/\sqrt{3})$ . <sup>b</sup>Pore width obtained from the BJH method with the corrected Kelvin equation, i.e. KJS–BJH method at the maximum of pore size distribution calculated on the basis of adsorption data. <sup>c</sup>Pore wall thickness calculated as  $(2d_{100}/\sqrt{3} - d_p)$ , where the first term is the unit cell parameter.

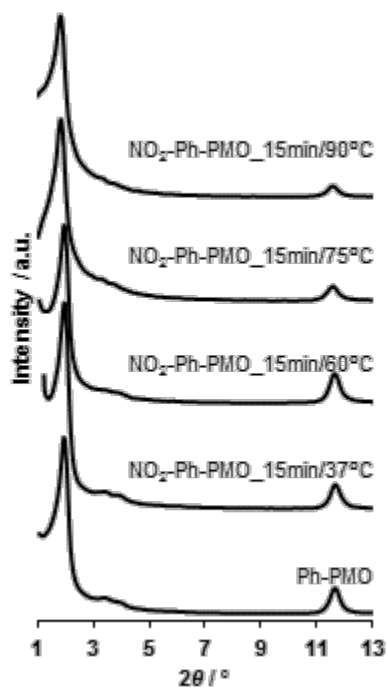

**Figure S4.** X-ray diffraction patterns of Ph-PMO and NO<sub>2</sub>-Ph-PMO<sub>15min</sub> synthesized at different reaction temperatures during 15 minutes.

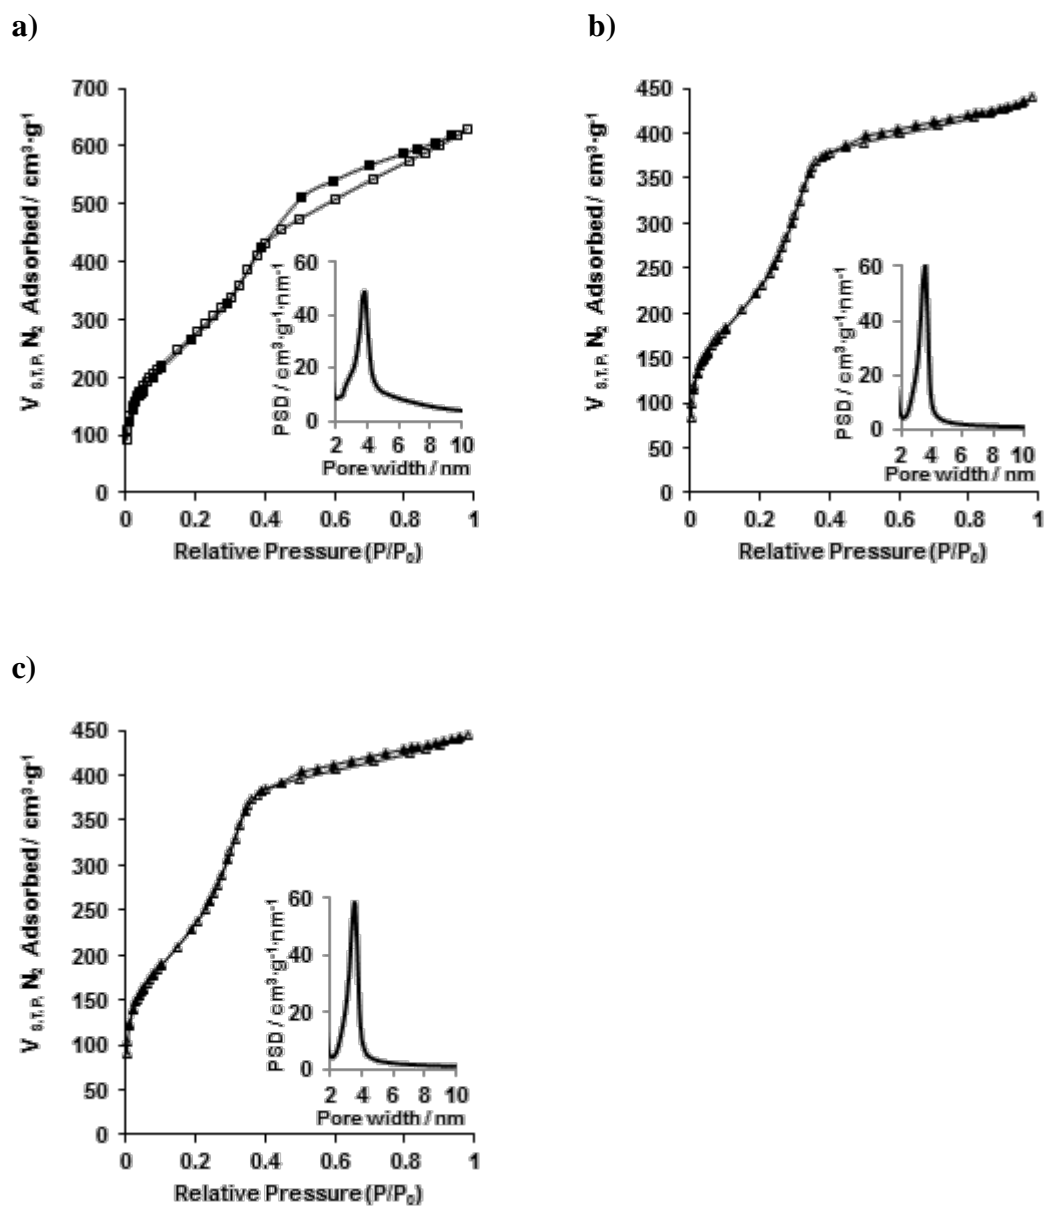

**Figure S5.** -196 °C nitrogen type IV isotherms of: a) PMO; b)  $NO_2$ -PMO\_15min/37°C and c)  $NO_2$ -PMO\_360min/60°C. Empty/filled symbols correspond to adsorption/desorption. The insets display the characteristic narrow PSD curves of PMO materials.

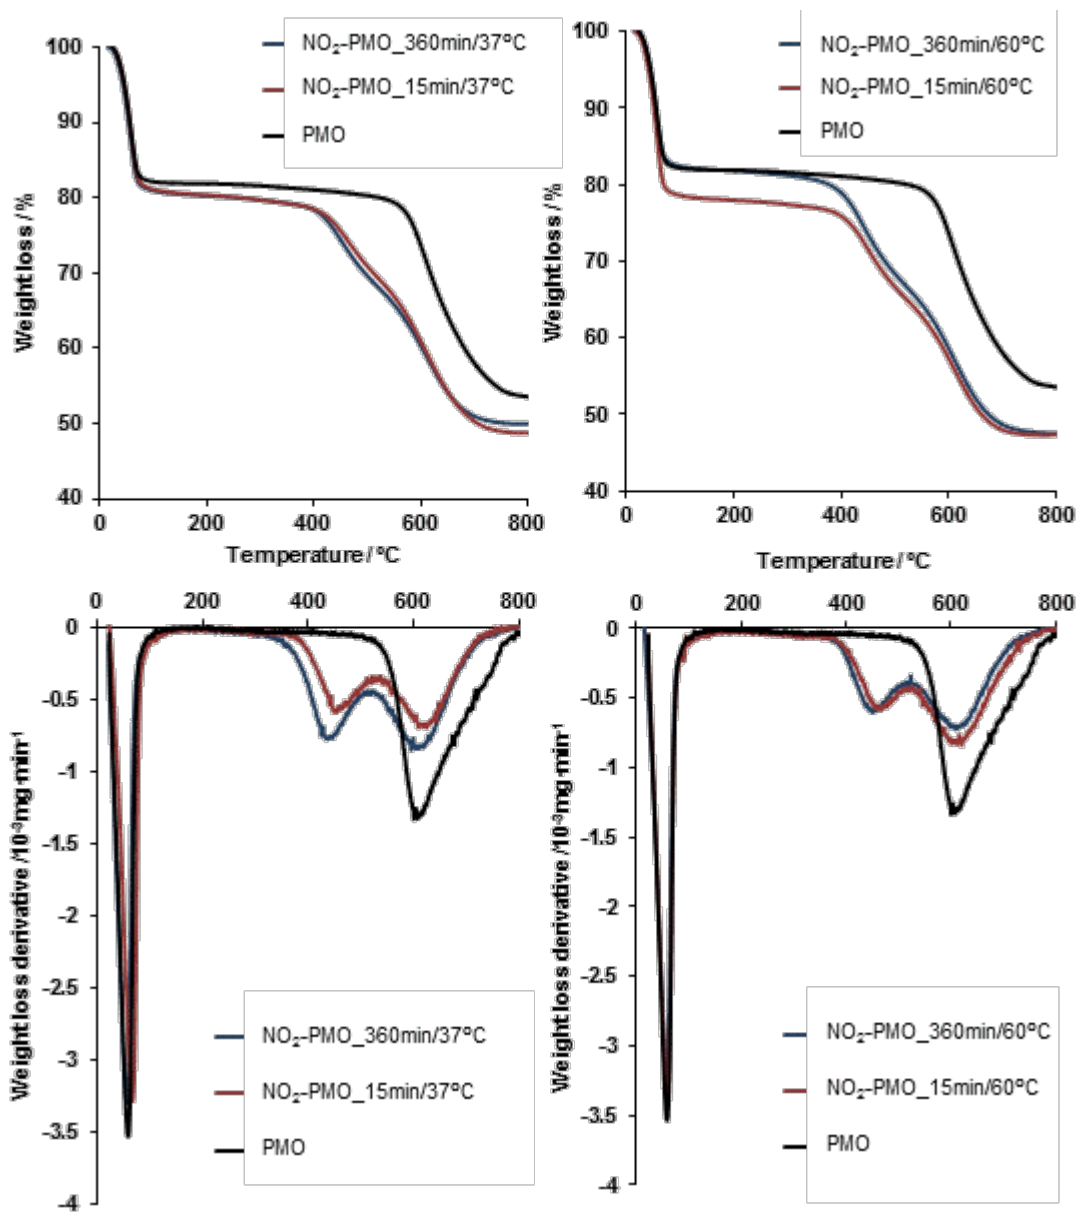

**Figure S6.** Weight loss curves (up) and weight loss derivatives (down) for PMO and NO<sub>2</sub>-PMO.



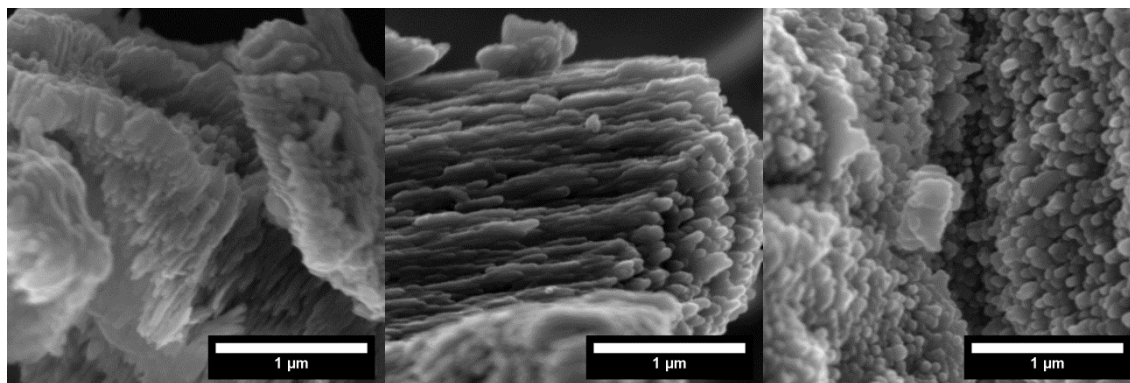

**Figure S7.** Scanning electron microscopy images for NO<sub>2</sub>-PMO\_C (left), NO<sub>2</sub>-PMO\_15min/37°C (middle) and NO<sub>2</sub>-PMO\_360min/60°C (right).

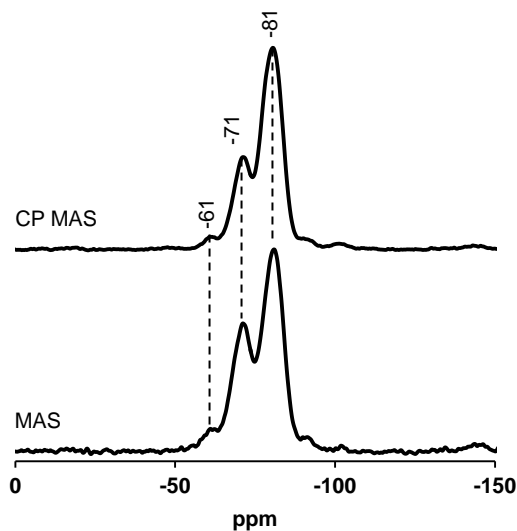

**Figure S8.** <sup>29</sup>Si MAS and CP MAS NMR spectra of the NH<sub>2</sub>-PMO\_15min/60°C.

**Table S2.** Physical properties of PMO, NO<sub>2</sub>-PMO\_15min/60°C and NH<sub>2</sub>-PMO\_15min/y materials.

| Sample                            | $d_{100} / \text{nm}$ | $a / \text{nm}^a$ | $S_{\text{BET}} / \text{m}^2 \text{g}^{-1}$ | $V_p / \text{cm}^3 \text{g}^{-1}$ | $d_p / \text{nm}^b$ | $b / \text{nm}^c$ |
|-----------------------------------|-----------------------|-------------------|---------------------------------------------|-----------------------------------|---------------------|-------------------|
| PMO                               | 4.55                  | 5.25              | 920                                         | 0.66                              | 3.58                | 1.67              |
| NO <sub>2</sub> -PMO_15min/60°C   | 4.70                  | 5.42              | 698                                         | 0.57                              | 3.54                | 1.88              |
| NH <sub>2</sub> -PMO_15min/37°C_C | 4.46                  | 5.15              | 752                                         | 0.44                              | 3.27                | 1.88              |
| NH <sub>2</sub> -PMO_15min/37°C   | 4.37                  | 5.05              | 722                                         | 0.44                              | 3.40                | 1.65              |
| NH <sub>2</sub> -PMO_15min/60°C   | 4.41                  | 5.10              | 699                                         | 0.44                              | 3.40                | 1.70              |
| NH <sub>2</sub> -PMO_15min/75°C   | 4.37                  | 5.05              | 688                                         | 0.43                              | 3.40                | 1.65              |
| NH <sub>2</sub> -PMO_15min/90°C   | 4.46                  | 5.15              | 686                                         | 0.44                              | 3.54                | 1.61              |

<sup>a</sup>Unit cell parameter calculated as  $(2d_{100}/\sqrt{3})$ . <sup>b</sup>Pore width obtained from the BJH method with the corrected Kelvin equation, i.e. KJS-BJH method at the maximum of pore size distribution calculated on the basis of adsorption data. <sup>c</sup>Pore wall thickness calculated as  $(2d_{100}/\sqrt{3} - d_p)$ , where the first term is the unit cell parameter.

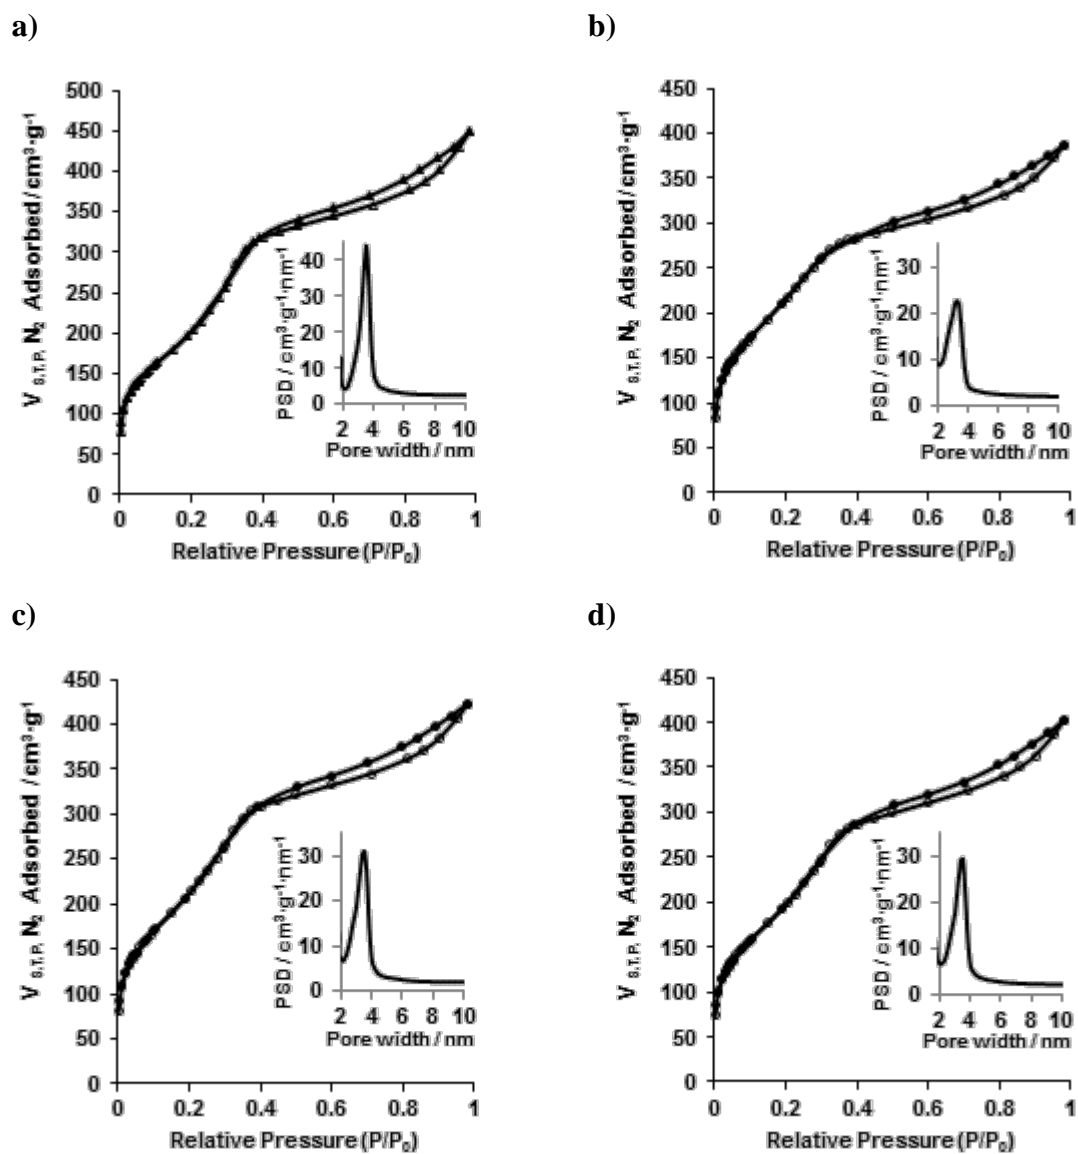

**Figure S9.**  $-196^\circ\text{C}$   $N_2$  isotherms of a)  $\text{NO}_2\text{-PMO}_{15\text{min}/60^\circ\text{C}}$  (triangles); b)  $\text{NH}_2\text{-PMO}_{15\text{min}/37^\circ\text{C}_C}$  (circles); c)  $\text{NH}_2\text{-PMO}_{15\text{min}/37^\circ\text{C}}$  (circles) and d)  $\text{NH}_2\text{-PMO}_{15\text{min}/90^\circ\text{C}}$  (circles). Empty/full symbols correspond to adsorption/desorption. The insets display PSD curves.

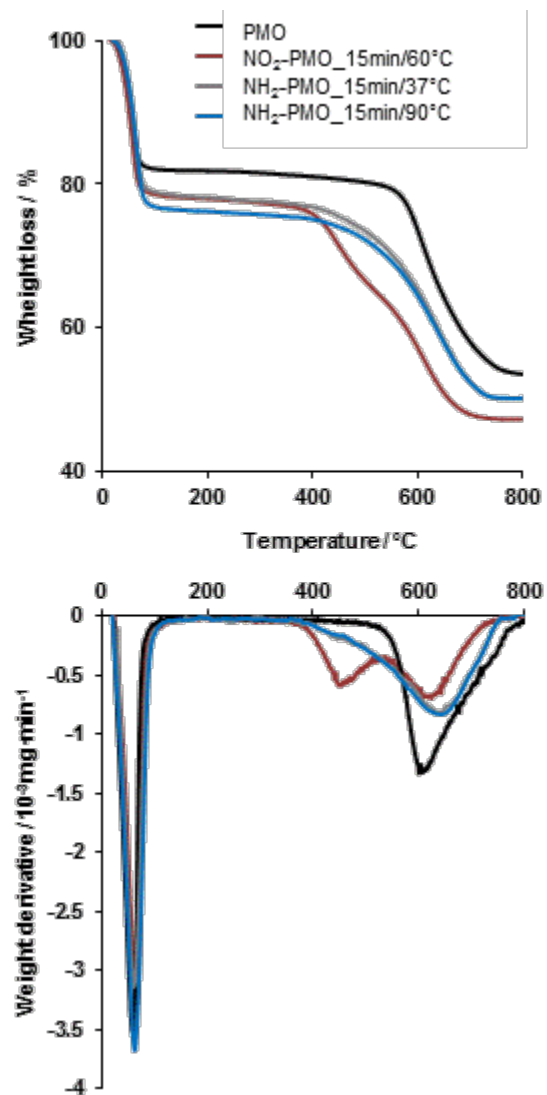

**Figure S10.** Weight loss curves (up) and weight loss derivatives (down) for PMO, NO<sub>2</sub>-PMO\_15min/60°C, NH<sub>2</sub>-PMO\_15min/37°C and NH<sub>2</sub>-PMO\_15min/90°C.
